Correction

# Correction: Reactive Searching and Infotaxis in Odor Source Localization

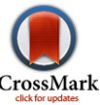

The *PLOS Computational Biology* Staff

## Notice of Republication

This article was republished on October 28, 2014, to correct an error in displaying the PDF. Please download the PDF again to view it correctly. The previous version of the PDF is not available because an error prevented it from being viewed.

## Reference

1. Voges N, Chaffiol A, Lucas P, Martinez D (2014) Reactive Searching and Infotaxis in Odor Source Localization. *PLoS Comput Biol* 10(10): e1003861. doi:10.1371/journal.pcbi.1003861

**Citation:** The *PLOS Computational Biology* Staff (2014) Correction: Reactive Searching and Infotaxis in Odor Source Localization. *PLoS Comput Biol* 10(11): e1004019. doi:10.1371/journal.pcbi.1004019

**Published:** November 17, 2014

**Copyright:** © 2014 The *PLOS Computational Biology* Staff. This is an open-access article distributed under the terms of the Creative Commons Attribution License, which permits unrestricted use, distribution, and reproduction in any medium, provided the original author and source are credited.
